# Supplementary material
Source: Springer Nature journal article supplement (https://www.springermedizin.de/resource/supplementary/13075_2011_3543_MOESM1_ESM.pdf/9694772)

**(A)**

**CD4+ T-cells**

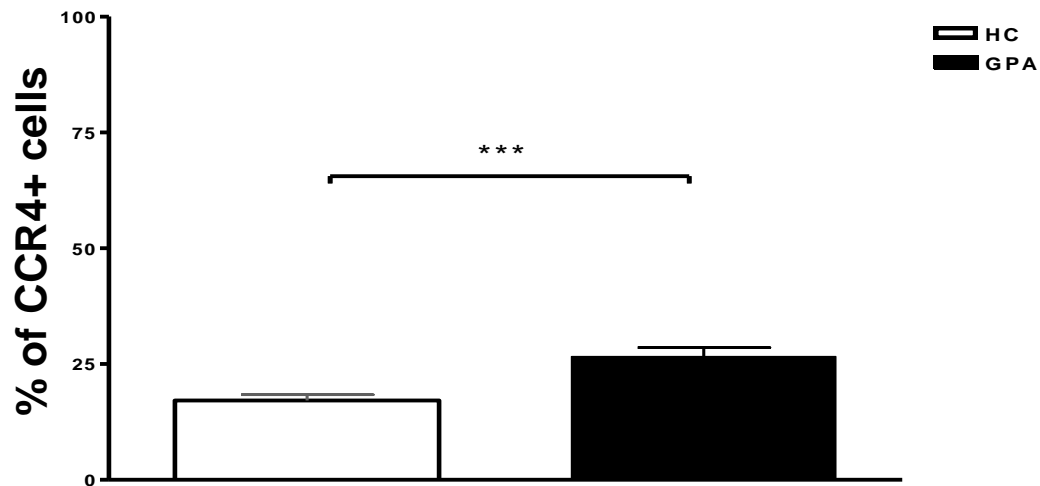

**(B)**

**CD4+ T-cells**

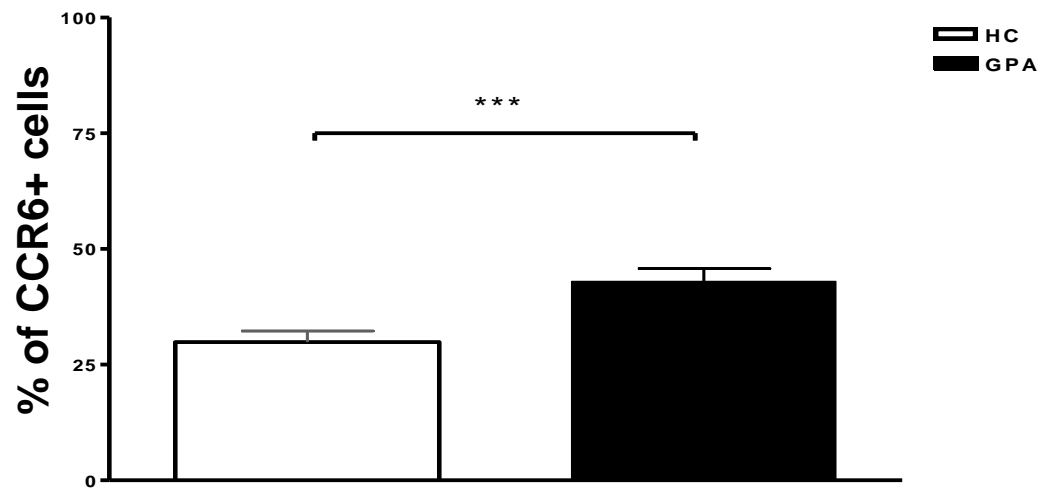

Supplement: MOESM1 [file 9694772]
